# Supplementary material for: Genome-Wide Identification and Characterization of Xyloglucan Endotransglycosylase/Hydrolase in Ananas comosus during Development
Source: MDPI journal article supplement (doi:10.3390/genes10070537), 2019-07-16
Supplement: s1 [file s1]

### Motif A

### otif B

[illegible]
