# Supplementary figures and images for: Genome-Wide Identification and Characterization of Xyloglucan Endotransglycosylase/Hydrolase in Ananas comosus during Development
Source: MDPI journal article supplement (doi:10.3390/genes10070537), 2019-07-16

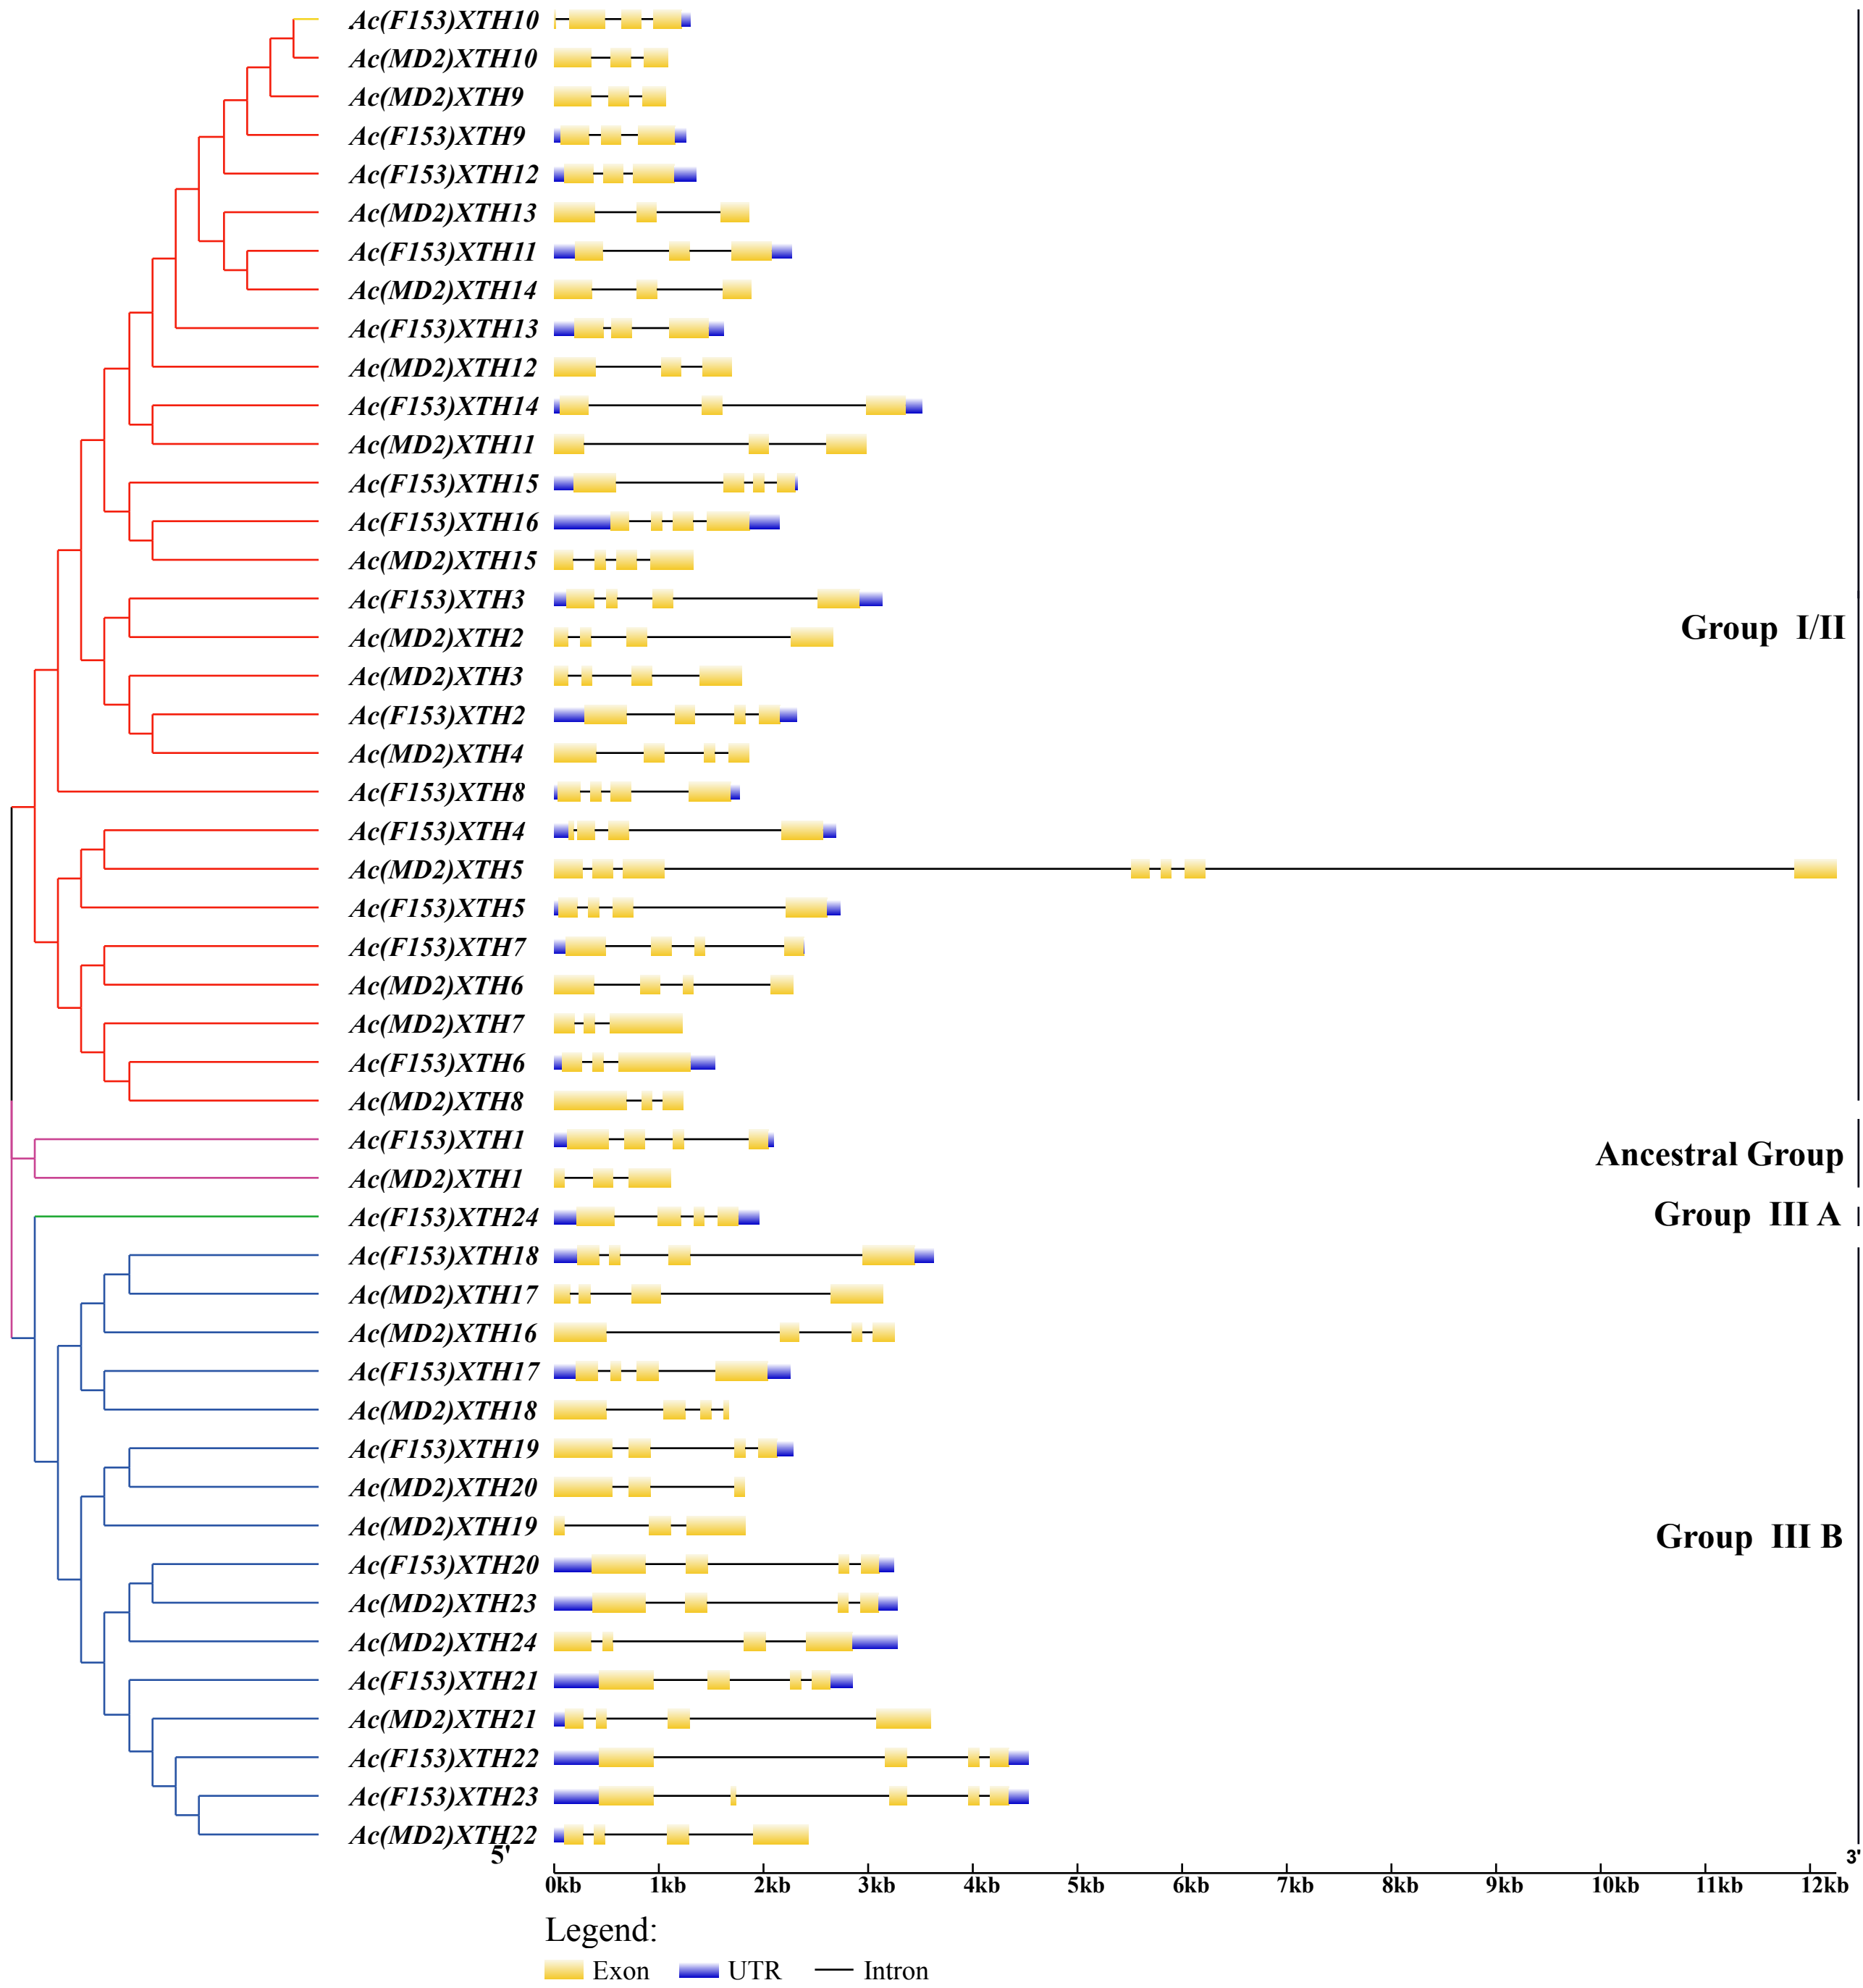

Supplement: s1 [file s1]

**A****Relative expression levels***Ac(MD2)XTH18*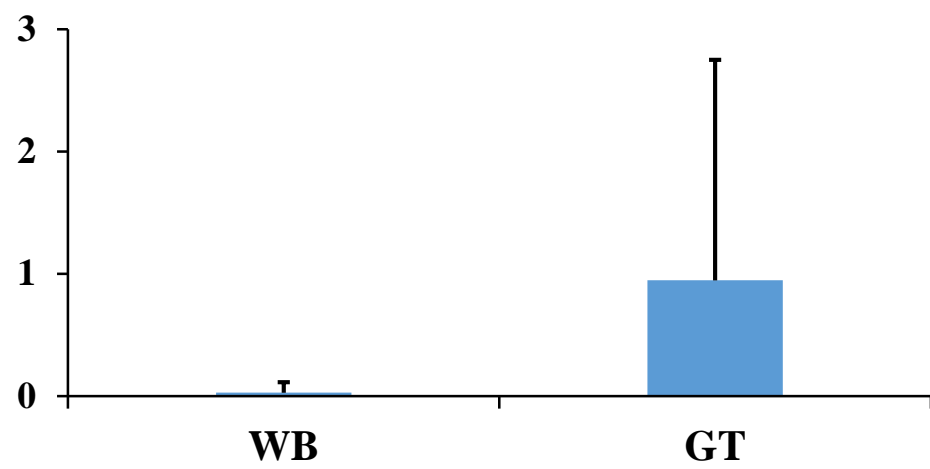*Ac(MD2)XTH11*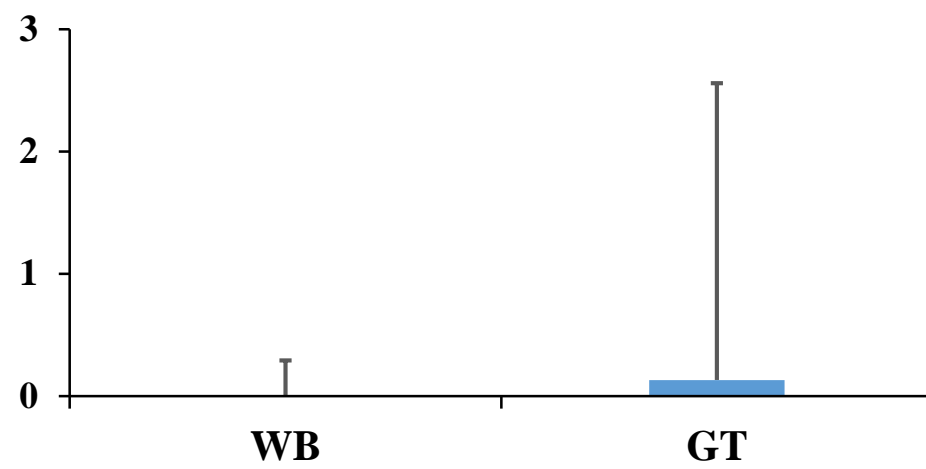**B****Relative expression levels****WB**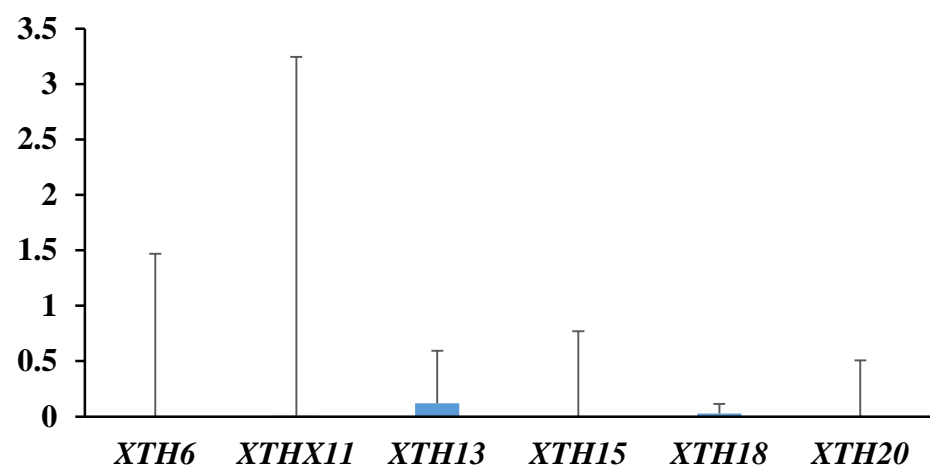

Supplement: s1 [file s1]

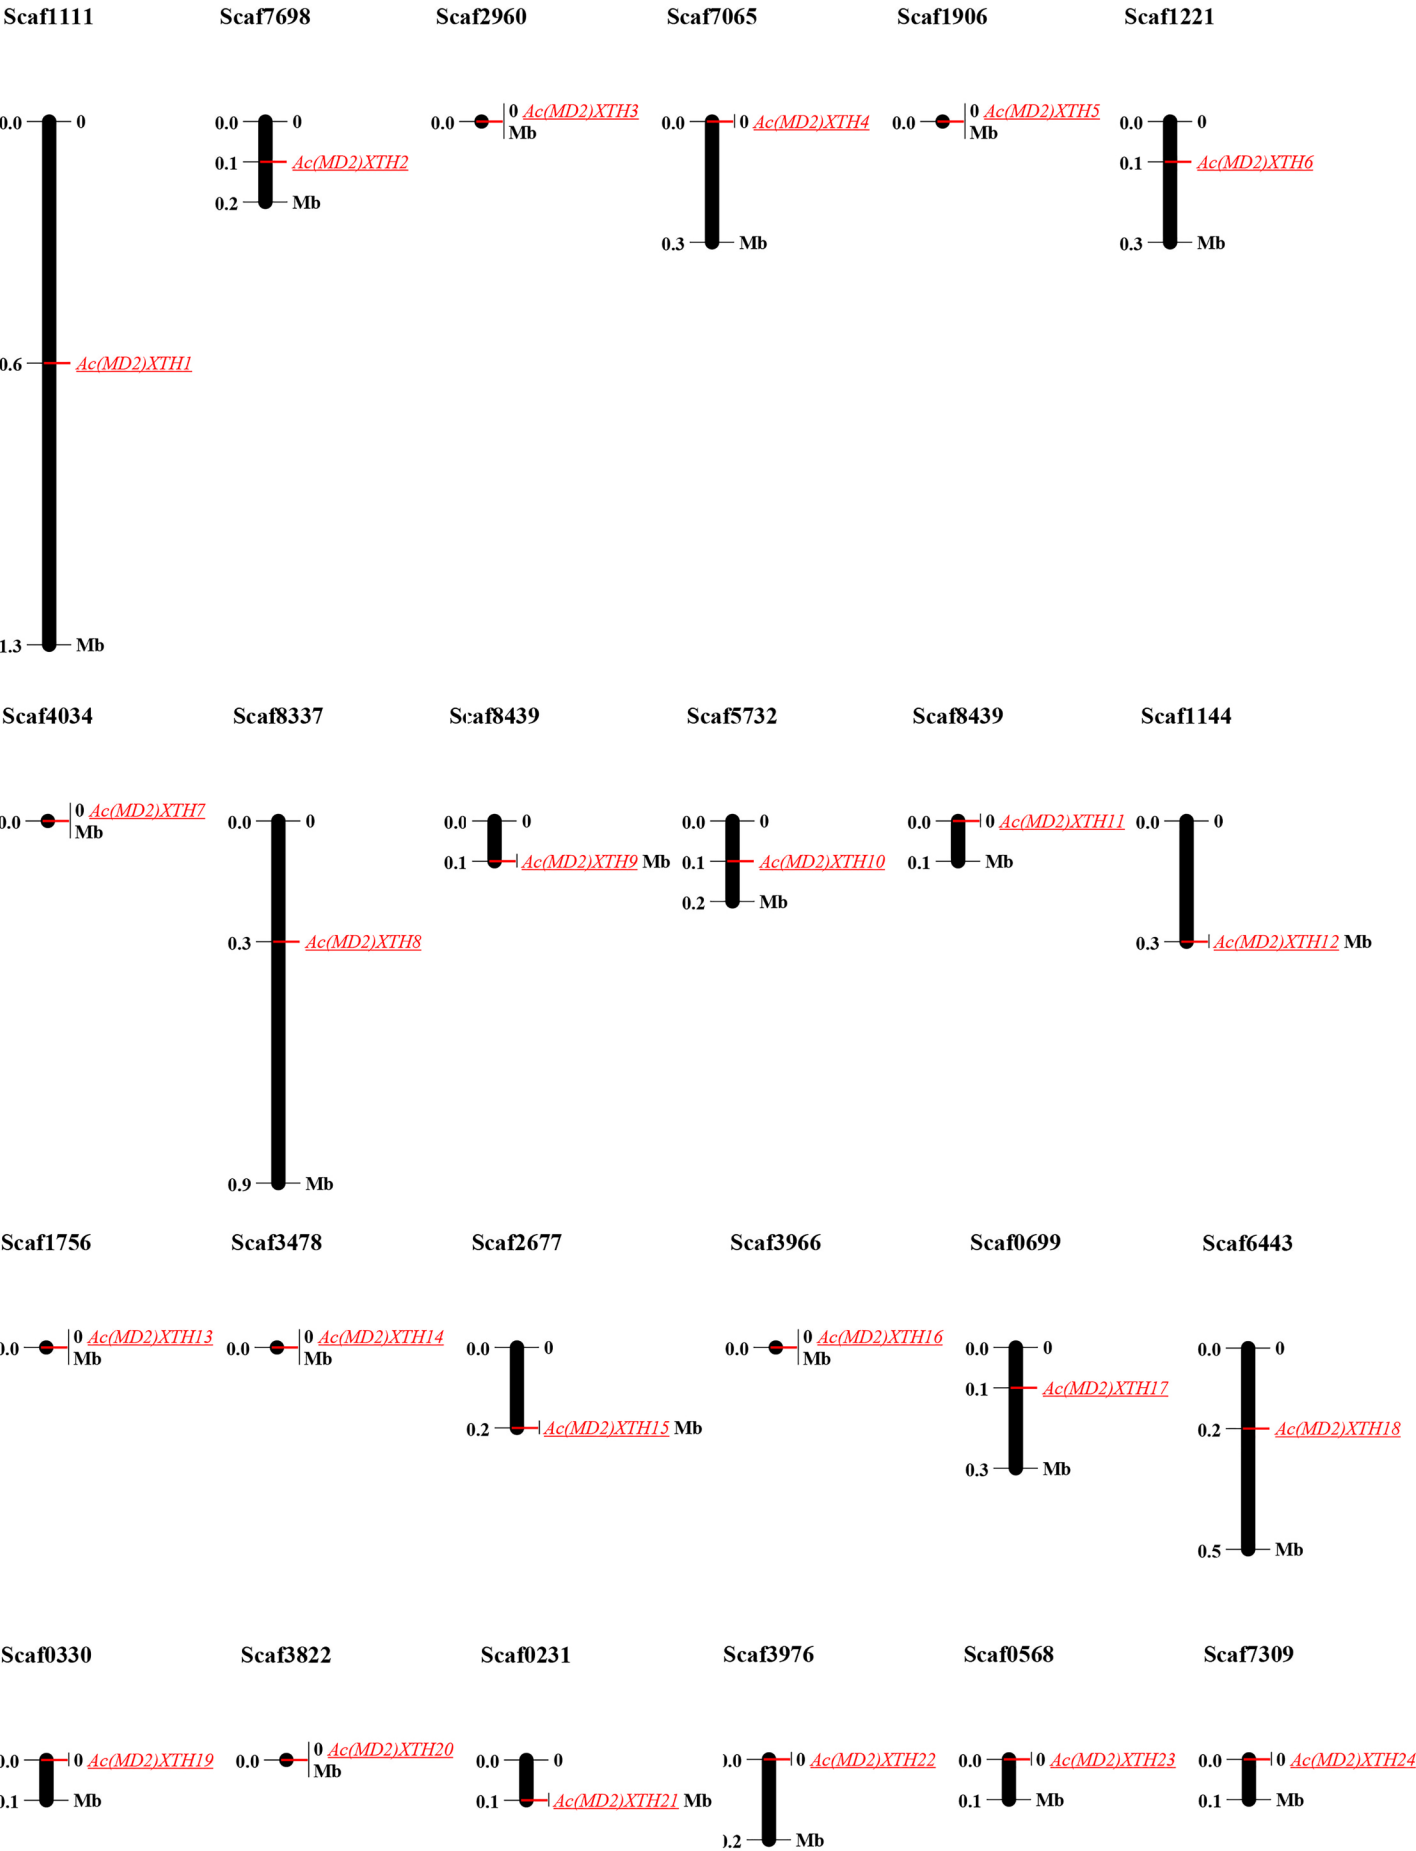

Supplement: s1 [file s1]
